# Supplementary material for: Comparative HIV-1 Phylogenies Characterized by PR/RT, Pol and Near-Full-Length Genome Sequences
Source: MDPI journal article supplement (doi:10.3390/v14102286), 2022-10-17
Supplement: s1 [file s1]

**Table S1.** Comparison of subtyping results of 134 samples based on ‘PR/RT’ and ‘POL’ region nucleotide sequences utilizing six subtyping tools.

| No. | Samples <sup>1</sup> | GenBank<br>Accession<br>Numbers | REGA 3.0 <sup>4</sup> |                            | COMET 2.3 <sup>5</sup> |                                                                          | jpHMM <sup>6</sup> |               | SCUEAL <sup>7</sup>  |                      | Stanford <sup>8</sup> |           | Geno2pheno 3.4 <sup>9</sup> |        | Discrepancy <sup>10</sup> |     |         |
|-----|----------------------|---------------------------------|-----------------------|----------------------------|------------------------|--------------------------------------------------------------------------|--------------------|---------------|----------------------|----------------------|-----------------------|-----------|-----------------------------|--------|---------------------------|-----|---------|
|     |                      |                                 | PR/RT <sup>2</sup>    | POL <sup>3</sup>           | PR/RT                  | POL                                                                      | PR/RT              | POL           | PR/RT                | POL                  | PR/RT                 | POL       | PR/RT                       | POL    | PR/RT                     | POL | Regions |
| 1   | CY391                | ON989213                        | A1                    | A1                         | A1                     | A1                                                                       | A1                 | A1            | A1                   | A1                   | A                     | A         | A1                          | A1     | -                         | -   | -       |
| 2   | CY393                | ON989214                        | CRF02_AG              | CRF02_AG                   | 02_AG                  | 02_AG                                                                    | A1 G               | A1 G          | Complex              | Complex              | CRF02_AG              | CRF02_AG  | 02_AG                       | 02_AG  | -                         | -   | -       |
| 3   | CY394                | ON989215                        | CRF 35_AD             | Rec. of<br>35_AD, G        | 35_AD                  | Unassigned;<br>35_AD,<br>14_BG, G,<br>20_BG, G,<br>24_BG, G,<br>14_BG, G | A1 D               | A1 D<br>G     | A1, D<br>recombinant | Complex              | CRF35_AD              | A + D     | A1                          | A1     | YES                       | YES | YES     |
| 4   | CY395                | ON989216                        | Rec. of<br>14_BG, A1  | Rec. of A1,<br>G           | Unassigned;<br>G, A1   | Unassigned;<br>A1, G                                                     | A1 G               | A1 G          | A1, G<br>recombinant | A1, G<br>recombinant | G                     | A         | 14_BG                       | A1     | YES                       | YES | YES     |
| 5   | CY396                | ON989217                        | CRF02_AG              | CRF02_AG                   | 02_AG                  | 02_AG                                                                    | G                  | A1 G          | Complex              | CRF02-like           | CRF02_AG              | CRF02_AG  | 02_AG                       | 02_AG  | YES                       | -   | -       |
| 6   | CY398                | ON989218                        | B                     | B                          | B                      | B                                                                        | B                  | B             | B                    | B                    | B                     | B         | B                           | B      | -                         | -   | -       |
| 7   | CY399                | ON989219                        | G-like                | Rec. of<br>02_AG, G,<br>A1 | 02_AG                  | 02_AG                                                                    | G                  | A1 G          | G                    | Complex              | CRF02_AG              | CRF02_AG  | 02_AG                       | 02_AG  | YES                       | YES | YES     |
| 8   | CY401                | ON989220                        | A1                    | A1                         | A1                     | A1                                                                       | A1                 | A1            | A1                   | A1, G<br>recombinant | A                     | A         | 01_AE                       | A1     | YES                       | YES | YES     |
| 9   | CY403                | ON989221                        | B                     | B                          | B                      | B                                                                        | B                  | B             | B                    | B                    | B                     | B         | B                           | B      | -                         | -   | -       |
| 10  | CY405                | ON989222                        | CRF02_AG              | CRF02_AG                   | 02_AG                  | 02_AG                                                                    | G                  | A1 G          | Complex              | Complex              | CRF02_AG              | CRF02_AG  | 02_AG                       | 02_AG  | YES                       | -   | -       |
| 11  | CY408                | ON989223                        | A1                    | A1                         | A1                     | A1                                                                       | A1                 | A1            | A1                   | A1                   | A                     | A         | A1                          | A1     | -                         | -   | -       |
| 12  | CY409                | ON989224                        | B                     | B                          | B                      | B                                                                        | B                  | B             | B                    | B                    | B                     | B         | B                           | B      | -                         | -   | -       |
| 13  | CY411                | ON989225                        | B                     | B                          | B                      | B                                                                        | B                  | B             | B                    | B                    | B                     | B         | B                           | B      | -                         | -   | -       |
| 14  | CY413                | ON989226                        | B                     | Rec. of B,<br>A1           | Unassigned;<br>B, A1   | Unassigned;<br>B, A1                                                     | B                  | A1 B          | B, G<br>recombinant  | A1, B<br>recombinant | B                     | B         | B                           | B      | YES                       | YES | YES     |
| 15  | CY414                | ON989227                        | A1                    | A1                         | A1                     | A1                                                                       | A1                 | A1            | A1                   | A1                   | A                     | A         | A1                          | A1     | -                         | -   | -       |
| 16  | CY418                | ON989228                        | B                     | B                          | B                      | B                                                                        | B                  | B             | B                    | B                    | B                     | B         | B                           | B      | -                         | -   | -       |
| 17  | CY421                | ON989229                        | B                     | B                          | B                      | B                                                                        | B                  | B             | B                    | B                    | B                     | B         | B                           | B      | -                         | -   | -       |
| 18  | CY422                | ON989230                        | CRF06_CPX             | CRF06_CPX                  | 06_cpx                 | 06_cpx                                                                   | D                  | A1 C<br>D G J | CRF32-like           | Complex              | CRF06_cpx             | CRF06_cpx | 06_CPX                      | 06_CPX | YES                       | YES | YES     |
| 19  | CY423                | ON989231                        | CRF02_AG              | CRF02_AG                   | 02_AG                  | A1 (check<br>for 02_AG)                                                  | A1 G               | A1 G          | Complex              | CRF02-like           | CRF02_AG              | CRF02_AG  | 02_AG                       | 02_AG  | -                         | -   | -       |
| 20  | CY424                | ON989232                        | A1                    | A1                         | A1                     | A1                                                                       | A1                 | A1            | A1                   | A1                   | A                     | A         | A1                          | A1     | -                         | -   | -       |
| 21  | CY425                | ON989233                        | B                     | B                          | B                      | B                                                                        | B                  | B             | B                    | B                    | B                     | B         | B                           | B      | -                         | -   | -       |
| 22  | CY427                | ON989234                        | B                     | B                          | B                      | B                                                                        | B                  | B             | B                    | B                    | B                     | B         | B                           | B      | -                         | -   | -       |
| 23  | CY439                | ON989235                        | A1                    | A1                         | A1                     | A1                                                                       | A1                 | A1            | A1                   | A1                   | A                     | A         | A1                          | A1     | -                         | -   | -       |
| 24  | CY443                | ON989236                        | B                     | B                          | B                      | B                                                                        | B                  | B             | B                    | B                    | B                     | B         | B                           | B      | -                         | -   | -       |
| 25  | CY444                | ON989237                        | A1                    | A1                         | A1                     | A1                                                                       | A1                 | A1            | A1                   | A1                   | A                     | A         | A1                          | A1     | -                         | -   | -       |
| 26  | CY447                | ON989238                        | A1                    | A1                         | A1                     | A1                                                                       | A1                 | A1            | A1                   | A1                   | A                     | A         | A1                          | A1     | -                         | -   | -       |

| No. | Samples <sup>1</sup> | GenBank<br>Accession<br>Numbers | REGA 3.0 <sup>4</sup> |                  | COMET 2.3 <sup>5</sup>    |                                                                                                                                | jpHMM <sup>6</sup> |          | SCUEAL <sup>7</sup> |                   | Stanford <sup>8</sup> |              | Geno2pheno 3.4 <sup>9</sup> |        | Discrepancy <sup>10</sup> |     |         |
|-----|----------------------|---------------------------------|-----------------------|------------------|---------------------------|--------------------------------------------------------------------------------------------------------------------------------|--------------------|----------|---------------------|-------------------|-----------------------|--------------|-----------------------------|--------|---------------------------|-----|---------|
|     |                      |                                 | PR/RT <sup>2</sup>    | POL <sup>3</sup> | PR/RT                     | POL                                                                                                                            | PR/RT              | POL      | PR/RT               | POL               | PR/RT                 | POL          | PR/RT                       | POL    | PR/RT                     | POL | Regions |
| 27  | CY448                | ON989239                        | Rec. of B, G          | Rec. of B, A1, G | Unassigned; 02_AG, 56_cpx | Unassigned; 56_cpx, 02_AG, 63_02A1, 02_AG, 71_BF1, 25_cpx, 02_AG, C, 43_02G, 02_AG, 71_BF1, 05_DF, 71_BF1, 05_DF, 02_AG, A1, B | B G                | A1 B G   | B, G recombinant    | Complex           | B + CRF02_AG          | B + CRF02_AG | 02_AG                       | B      | YES                       | YES | YES     |
| 28  | CY449                | ON989240                        | A1                    | A1               | A1                        | A1                                                                                                                             | A1                 | A1       | A1                  | A1                | A                     | A            | A1                          | A1     | -                         | -   | -       |
| 29  | CY450                | ON989241                        | A1                    | A1               | A1                        | A1                                                                                                                             | A1                 | A1       | A1                  | A1                | A                     | A            | A1                          | A1     | -                         | -   | -       |
| 30  | CY451                | ON989242                        | C                     | C                | C                         | C                                                                                                                              | C                  | C        | C                   | C                 | C                     | C            | C                           | C      | -                         | -   | -       |
| 31  | CY452                | ON989243                        | B                     | B                | B                         | B                                                                                                                              | B                  | B        | B                   | B                 | B                     | B            | B                           | B      | -                         | -   | -       |
| 32  | CY455                | ON989244                        | A1                    | A1               | A1                        | A1                                                                                                                             | A1                 | A1       | A1                  | A1                | A                     | A            | 01_AE                       | A1     | YES                       | -   | -       |
| 33  | CY457                | ON989245                        | B                     | Rec. of B, A1    | B                         | Unassigned; B, A1                                                                                                              | B                  | A1 B     | B                   | A3, B recombinant | B                     | B            | B                           | B      | -                         | YES | YES     |
| 34  | CY459                | ON989246                        | F1                    | F1               | F1                        | F1                                                                                                                             | F1                 | F1       | F1                  | F1                | F                     | F            | F1                          | F1     | -                         | -   | -       |
| 35  | CY461                | ON989247                        | B                     | B                | B                         | B                                                                                                                              | B                  | B        | B                   | B                 | B                     | B            | B                           | B      | -                         | -   | -       |
| 36  | CY462                | ON989248                        | CRF 06_CPX            | CRF 06_CPX       | 06_cpx                    | 06_cpx                                                                                                                         | A1 C G             | A1 C G J | G, K recombinant    | CRF06-like        | CRF06_cpx             | CRF06_cpx    | 06_CPX                      | 06_CPX | YES                       | YES | YES     |
| 37  | CY463                | ON989249                        | 01_AE                 | 01_AE            | 01_AE                     | 01_AE                                                                                                                          | 01_AE              | 01_AE    | AE                  | AE                | CRF01_AE              | CRF01_AE     | 01_AE                       | 01_AE  | -                         | -   | -       |
| 38  | CY465                | ON989250                        | F1                    | F1               | F1                        | F1                                                                                                                             | F1                 | F1       | F1                  | F1                | F                     | F            | F1                          | F1     | -                         | -   | -       |
| 39  | CY466                | ON989251                        | B                     | B                | B                         | B                                                                                                                              | B                  | B        | B                   | B                 | B                     | B            | B                           | B      | -                         | -   | -       |
| 40  | CY467                | OK584018                        | Rec. of G, A1         | Rec. of G, A1, B | 02_AG                     | Unassigned; 02_AG, 11_cpx, 01_AE, 90_BF1, B, D, B, D, B, D, B                                                                  | G                  | A1 B G   | G                   | Complex           | CRF02_AG              | CRF02_AG     | 02_AG                       | 02_AG  | YES                       | YES | YES     |
| 41  | CY470                | ON989252                        | 02_AG                 | CRF 02_AG        | 02_AG                     | 02_AG                                                                                                                          | G                  | A1 G     | G                   | CRF02-like        | CRF02_AG              | CRF02_AG     | 02_AG                       | 02_AG  | YES                       | -   | -       |
| 42  | CY471                | ON989253                        | A1                    | Rec. of A1, B    | A1                        | Unassigned; A1, B                                                                                                              | A1                 | A1 B     | A1                  | A1, B recombinant | A                     | A            | A1                          | A1     | -                         | YES | YES     |

| No. | Samples <sup>1</sup> | GenBank<br>Accession<br>Numbers | REGA 3.0 <sup>4</sup> |                     | COMET 2.3 <sup>5</sup>                                                                            |                                                                                                                                                                       | jpHMM <sup>6</sup> |           | SCUEAL <sup>7</sup>  |                     | Stanford <sup>8</sup> |                 | Geno2pheno 3.4 <sup>9</sup> |       | Discrepancy <sup>10</sup> |     |         |
|-----|----------------------|---------------------------------|-----------------------|---------------------|---------------------------------------------------------------------------------------------------|-----------------------------------------------------------------------------------------------------------------------------------------------------------------------|--------------------|-----------|----------------------|---------------------|-----------------------|-----------------|-----------------------------|-------|---------------------------|-----|---------|
|     |                      |                                 | PR/RT <sup>2</sup>    | POL <sup>3</sup>    | PR/RT                                                                                             | POL                                                                                                                                                                   | PR/RT              | POL       | PR/RT                | POL                 | PR/RT                 | POL             | PR/RT                       | POL   | PR/RT                     | POL | Regions |
| 43  | CY472                | ON989254                        | F1                    | F1                  | F1                                                                                                | F1                                                                                                                                                                    | F1                 | F1        | F1                   | F1                  | F                     | F               | F1                          | F1    | -                         | -   | -       |
| 44  | CY473                | ON989255                        | B                     | Rec. of B,<br>G, A1 | B                                                                                                 | Unassigned;<br>02_AG,<br>38_BF1, B,<br>94_cpx,<br>08_BC, B,<br>08_BC, B,<br>07_BC,<br>90_BF1,<br>07_BC,<br>52_01B,<br>07_BC,<br>90_BF1, B,<br>68_01B, B,<br>90_BF1, B | B G                | A1 B<br>G | Complex              | Complex             | B                     | B               | B                           | B     | YES                       | YES | YES     |
| 45  | CY477                | ON989256                        | B                     | B                   | B                                                                                                 | B                                                                                                                                                                     | B                  | B         | B                    | B                   | B                     | B               | B                           | B     | -                         | -   | -       |
| 46  | CY478                | ON989257                        | B                     | B                   | B                                                                                                 | B                                                                                                                                                                     | B                  | B         | B                    | B                   | B                     | B               | B                           | B     | -                         | -   | -       |
| 47  | CY479                | ON989258                        | 01_AE                 | 01_AE               | 01_AE                                                                                             | 01_AE                                                                                                                                                                 | 01_AE              | 01_AE     | AE                   | AE                  | CRF01_AE              | CRF01_AE        | 01_AE                       | 01_AE | -                         | -   | -       |
| 48  | CY480                | ON989259                        | CRF 02_AG             | CRF 02_AG           | 02_AG                                                                                             | 02_AG                                                                                                                                                                 | A1 G               | A1 G      | A1, G<br>recombinant | A, G<br>recombinant | CRF02_AG              | CRF02_AG        | 02_AG                       | 02_AG | -                         | -   | -       |
| 49  | CY482                | ON989260                        | A2                    | A2                  | A2                                                                                                | A2                                                                                                                                                                    | A2                 | A2        | A2                   | A2                  | A2                    | A2              | A2                          | A2    | -                         | -   | -       |
| 50  | CY483                | ON989261                        | C                     | C                   | C                                                                                                 | C                                                                                                                                                                     | C                  | C         | C                    | C                   | C                     | C               | C                           | C     | -                         | -   | -       |
| 51  | CY485                | ON989262                        | A1                    | A1                  | A1                                                                                                | A1                                                                                                                                                                    | A1                 | A1        | A1                   | A1                  | A                     | A               | A1                          | A1    | -                         | -   | -       |
| 52  | CY486                | ON989263                        | A1                    | A1                  | A1                                                                                                | A1                                                                                                                                                                    | A1                 | A1        | A1                   | A1                  | A                     | A               | A1                          | A1    | -                         | -   | -       |
| 53  | CY487                | ON989264                        | CRF 02_AG             | CRF 02_AG           | 02_AG                                                                                             | 02_AG                                                                                                                                                                 | G                  | A1 G      | Complex              | Complex             | CRF02_AG              | CRF02_AG        | 02_AG                       | 02_AG | YES                       | -   | -       |
| 54  | CY488                | ON989265                        | Rec. of B,<br>A1      | Rec. of B,<br>A1    | Unassigned;<br>56_cpx,<br>02_AG,<br>90_BF1,<br>72_BF1,<br>90_BF1,<br>72_BF1,<br>90_BF1,<br>83_cpx | Unassigned;<br>56_cpx,<br>02_AG,<br>90_BF1,<br>72_BF1,<br>90_BF1,<br>83_cpx,<br>90_BF1, A1,<br>02_AG,<br>19_cpx, B,<br>90_BF1                                         | A1 B               | A1 B      | Complex              | Complex             | B +<br>CRF02_AG       | B +<br>CRF02_AG | 02_AG                       | 03_AB | YES                       | YES | YES     |
| 55  | CY490                | ON989266                        | A1                    | A1                  | A1                                                                                                | A1                                                                                                                                                                    | A1                 | A1        | A1                   | A1                  | A                     | A               | 01_AE                       | A1    | YES                       | -   | -       |
| 56  | CY492                | ON989267                        | A1                    | A1                  | A1                                                                                                | A1                                                                                                                                                                    | A1                 | A1        | A1                   | A1                  | A                     | A               | 01_AE                       | A1    | YES                       | -   | -       |
| 57  | CY493                | ON989268                        | A1                    | A1                  | A1                                                                                                | A1                                                                                                                                                                    | A1                 | A1        | A1                   | A1                  | A                     | A               | 01_AE                       | A1    | YES                       | -   | -       |

| No. | Samples <sup>1</sup> | GenBank<br>Accession<br>Numbers | REGA 3.0 <sup>4</sup> |                     | COMET 2.3 <sup>5</sup>          |                                                                                                                                                      | jpHMM <sup>6</sup> |           | SCUEAL <sup>7</sup> |                                  | Stanford <sup>8</sup> |                 | Geno2pheno 3.4 <sup>9</sup> |       | Discrepancy <sup>10</sup> |     |         |
|-----|----------------------|---------------------------------|-----------------------|---------------------|---------------------------------|------------------------------------------------------------------------------------------------------------------------------------------------------|--------------------|-----------|---------------------|----------------------------------|-----------------------|-----------------|-----------------------------|-------|---------------------------|-----|---------|
|     |                      |                                 | PR/RT <sup>2</sup>    | POL <sup>3</sup>    | PR/RT                           | POL                                                                                                                                                  | PR/RT              | POL       | PR/RT               | POL                              | PR/RT                 | POL             | PR/RT                       | POL   | PR/RT                     | POL | Regions |
| 58  | CY494                | OK283056                        | Rec. of G,<br>A1      | Rec. of<br>02_AG, G | 02_AG                           | Unassigned;<br>02_AG,<br>11_cpx,<br>01_AE                                                                                                            | G                  | A1 G      | G                   | A-ancestral,<br>G<br>recombinant | CRF02_AG              | CRF02_AG        | 02_AG                       | 02_AG | YES                       | YES | YES     |
| 59  | CY495                | ON989269                        | B                     | B                   | B                               | B                                                                                                                                                    | B                  | B         | B                   | B                                | B                     | B               | B                           | B     | -                         | -   | -       |
| 60  | CY496                | ON989270                        | F1                    | F1                  | F1                              | F1                                                                                                                                                   | F1                 | F1        | F1                  | F1                               | F                     | F               | F1                          | F1    | -                         | -   | -       |
| 61  | CY497                | ON989271                        | G                     | Rec. of A1,<br>G    | 02_AG                           | 02_AG                                                                                                                                                | G                  | A1 G      | G                   | Complex                          | CRF02_AG              | CRF02_AG        | 02_AG                       | 02_AG | YES                       | -   | -       |
| 62  | CY498                | ON989272                        | B                     | B                   | B                               | B                                                                                                                                                    | B                  | B         | B                   | B                                | B                     | B               | B                           | B     | -                         | -   | -       |
| 63  | CY500                | ON989273                        | A1                    | A1                  | A1                              | A1                                                                                                                                                   | A1                 | A1        | A1                  | A1                               | A                     | A               | A1                          | A1    | -                         | -   | -       |
| 64  | CY504                | ON989274                        | F1                    | F1                  | F1                              | F1                                                                                                                                                   | F1                 | F1        | F1                  | F1                               | F                     | F               | F1                          | F1    | -                         | -   | -       |
| 65  | CY508                | ON989275                        | G                     | Rec. of G, K        | G                               | Unassigned;<br>G, A1, D                                                                                                                              | G                  | B G       | G                   | G, J<br>recombinant              | G                     | G               | G                           | G     | -                         | YES | YES     |
| 66  | CY509                | ON989276                        | B                     | B                   | B                               | B                                                                                                                                                    | B                  | B         | B                   | B                                | B                     | B               | B                           | B     | -                         | -   | -       |
| 67  | CY510                | ON989277                        | B                     | B                   | B                               | B                                                                                                                                                    | B                  | B         | B                   | B                                | B                     | B               | B                           | B     | -                         | -   | -       |
| 68  | CY515                | ON989278                        | Rec. of F1,<br>B      | Rec. of B,<br>F1    | F1                              | Unassigned;<br>B, F1, A1,<br>F1, F2                                                                                                                  | B F1               | B F1      | Complex             | B, F1<br>recombinant             | B                     | B               | 12_BF                       | B     | YES                       | YES | YES     |
| 69  | CY516                | ON989279                        | CRF 03_AB             | CRF 03_AB           | 03_AB                           | 03_AB                                                                                                                                                | A1 B               | A1 B      | CRF03               | CRF03                            | CRF03_AB              | A + B           | 03_AB                       | 03_AB | -                         | -   | -       |
| 70  | CY519                | ON989280                        | F1                    | Rec. of F1,<br>A1   | Unassigned;<br>71_BF1, A1       | Unassigned;<br>F1, A1,<br>01_AE, A1,<br>G                                                                                                            | F1                 | A1 F1     | F1                  | Complex                          | F                     | F               | F1                          | F2    | YES                       | YES | YES     |
| 71  | CY520                | OK283057                        | Rec. of G,<br>A1      | Rec. of<br>02_AG, G | 02_AG                           | Unassigned;<br>02_AG,<br>11_cpx,<br>01_AE                                                                                                            | G                  | A1 G      | G                   | Complex                          | CRF02_AG              | CRF02_AG        | 02_AG                       | 02_AG | YES                       | YES | YES     |
| 72  | CY523                | ON989281                        | A1                    | A1                  | A1                              | A1                                                                                                                                                   | A1                 | A1        | A1                  | A1                               | A                     | A               | A1                          | A1    | -                         | -   | -       |
| 73  | CY525                | ON989282                        | Rec. of G, B          | Rec. of B,<br>A1, G | Unassigned;<br>02_AG,<br>56_cpx | Unassigned;<br>02_AG,<br>56_cpx,<br>90_BF1, B,<br>90_BF1, B,<br>56_cpx, B,<br>56_cpx, B,<br>39_BF,<br>51_01B, B,<br>51_01B, B,<br>90_BF1,<br>56_cpx, | B C G              | A1 B<br>G | Complex             | Complex                          | B +<br>CRF02_AG       | B +<br>CRF02_AG | 02_AG                       | B     | YES                       | YES | YES     |

| No. | Samples <sup>1</sup> | GenBank<br>Accession<br>Numbers | REGA 3.0 <sup>4</sup> |                            | COMET 2.3 <sup>5</sup>                               |                                                                                                                                              | jpHMM <sup>6</sup> |           | SCUEAL <sup>7</sup> |                     | Stanford <sup>8</sup> |                 | Geno2pheno 3.4 <sup>9</sup> |       | Discrepancy <sup>10</sup> |     |         |
|-----|----------------------|---------------------------------|-----------------------|----------------------------|------------------------------------------------------|----------------------------------------------------------------------------------------------------------------------------------------------|--------------------|-----------|---------------------|---------------------|-----------------------|-----------------|-----------------------------|-------|---------------------------|-----|---------|
|     |                      |                                 | PR/RT <sup>2</sup>    | POL <sup>3</sup>           | PR/RT                                                | POL                                                                                                                                          | PR/RT              | POL       | PR/RT               | POL                 | PR/RT                 | POL             | PR/RT                       | POL   | PR/RT                     | POL | Regions |
|     |                      |                                 |                       |                            |                                                      | 90_BF1                                                                                                                                       |                    |           |                     |                     |                       |                 |                             |       |                           |     |         |
| 74  | CY526                | ON989283                        | Rec. of G, B          | Rec. of B,<br>A1, G        | Unassigned;<br>02_AG,<br>56_cpx                      | Unassigned;<br>02_AG,<br>56_cpx,<br>90_BF1, B,<br>90_BF1, B,<br>56_cpx, B,<br>39_BF,<br>90_BF1,<br>39_BF, B,<br>69_01B,<br>90_BF1,<br>56_cpx | B G                | A1 B<br>G | Complex             | Complex             | B +<br>CRF02_AG       | B +<br>CRF02_AG | 02_AG                       | B     | YES                       | YES | YES     |
| 75  | CY528                | ON989284                        | B                     | B-like                     | B                                                    | B                                                                                                                                            | B                  | B         | B                   | B                   | B                     | B               | B                           | B     | -                         | -   | -       |
| 76  | CY529                | ON989285                        | Rec. of G, B          | Rec. of B,<br>A1, G        | Unassigned;<br>02_AG,<br>56_cpx                      | Unassigned;<br>02_AG,<br>56_cpx,<br>90_BF1, B,<br>90_BF1, B,<br>56_cpx, B,<br>56_cpx, B,<br>39_BF,<br>90_BF1, B,<br>90_BF1,<br>56_cpx        | B C G              | A1 B<br>G | Complex             | Complex             | B +<br>CRF02_AG       | B +<br>CRF02_AG | 02_AG                       | B     | YES                       | YES | YES     |
| 77  | CY530                | ON989286                        | CRF 02_AG             | CRF 02_AG                  | 02_AG                                                | 02_AG                                                                                                                                        | A1 G               | A1 G      | Complex             | Complex             | CRF02_AG              | CRF02_AG        | 02_AG                       | 02_AG | -                         | -   | -       |
| 78  | CY533                | OK283058                        | Rec. of G,<br>A1      | Rec. of<br>02_AG, G,<br>A1 | 02_AG                                                | Unassigned;<br>02_AG,<br>11_cpx,<br>01_AE                                                                                                    | G                  | A1 G      | G                   | A, G<br>recombinant | CRF02_AG              | CRF02_AG        | 02_AG                       | 02_AG | YES                       | YES | YES     |
| 79  | CY534                | ON989287                        | A1                    | A1                         | A1                                                   | A1                                                                                                                                           | A1                 | A1        | A1                  | A1                  | A                     | A               | A1                          | A1    | -                         | -   | -       |
| 80  | CY535                | ON989288                        | CRF 02_AG             | CRF 02_AG                  | 02_AG                                                | 02_AG                                                                                                                                        | A1 D<br>G          | A1 C<br>G | Complex             | Complex             | CRF02_AG              | CRF02_AG        | 02_AG                       | 02_AG | YES                       | YES | YES     |
| 81  | CY537                | ON989289                        | Rec. of G,<br>B       | Rec. of B,<br>A1, G        | Unassigned;<br>02_AG,<br>90_BF1,<br>31_BC,<br>56_cpx | Unassigned;<br>02_AG,<br>90_BF1,<br>31_BC,<br>56_cpx,<br>90_BF1, B,<br>90_BF1, B,                                                            | B C G              | A1 B<br>G | Complex             | Complex             | B +<br>CRF02_AG       | B +<br>CRF02_AG | 02_AG                       | B     | YES                       | YES | YES     |

[illegible]

| No. | Samples <sup>1</sup> | GenBank<br>Accession<br>Numbers | REGA 3.0 <sup>4</sup> |                            | COMET 2.3 <sup>5</sup>   |                                           | jpHMM <sup>6</sup> |              | SCUEAL <sup>7</sup>  |                      | Stanford <sup>8</sup> |           | Geno2pheno 3.4 <sup>9</sup> |        | Discrepancy <sup>10</sup> |     |         |
|-----|----------------------|---------------------------------|-----------------------|----------------------------|--------------------------|-------------------------------------------|--------------------|--------------|----------------------|----------------------|-----------------------|-----------|-----------------------------|--------|---------------------------|-----|---------|
|     |                      |                                 | PR/RT <sup>2</sup>    | POL <sup>3</sup>           | PR/RT                    | POL                                       | PR/RT              | POL          | PR/RT                | POL                  | PR/RT                 | POL       | PR/RT                       | POL    | PR/RT                     | POL | Regions |
| 106 | CY575                | ON989314                        | A1                    | A1                         | A1                       | A1                                        | A1                 | A1           | A1                   | A1                   | A                     | A         | A1                          | A1     | -                         | -   | -       |
| 107 | CY576                | ON989315                        | CRF 02_AG             | CRF 02_AG                  | 02_AG                    | 02_AG                                     | A1 G               | A1 B<br>G    | Complex              | Complex              | CRF02_AG              | CRF02_AG  | 02_AG                       | 02_AG  | -                         | YES | YES     |
| 108 | CY579                | ON989316                        | CRF 02_AG             | CRF 02_AG                  | 02_AG                    | 02_AG                                     | C G                | A1 G         | Complex              | CRF02-like           | CRF02_AG              | CRF02_AG  | 02_AG                       | 02_AG  | YES                       | -   | -       |
| 109 | CY580                | ON989317                        | D                     | D-like                     | D                        | D                                         | D                  | D            | D                    | D                    | D                     | D         | D                           | D      | -                         | -   | -       |
| 110 | CY581                | ON989318                        | CRF 02_AG             | Rec. of<br>02_AG, G,<br>A1 | 02_AG                    | 02_AG                                     | A1 G               | A1 G         | G                    | A, G<br>recombinant  | CRF02_AG              | CRF02_AG  | 02_AG                       | 02_AG  | YES                       | YES | YES     |
| 111 | CY583                | ON989319                        | B                     | B                          | B                        | B                                         | B                  | B            | B                    | B                    | B                     | B         | B                           | B      | -                         | -   | -       |
| 112 | CY584                | ON989320                        | B                     | Rec. of B,<br>A1           | B                        | Unassigned;<br>B, A1                      | B                  | A1 B         | B, D<br>recombinant  | A1, B<br>recombinant | B                     | B         | B                           | B      | YES                       | YES | YES     |
| 113 | CY585                | ON989321                        | 02_AG                 | CRF 02_AG                  | 02_AG                    | 02_AG                                     | A1 G               | A1 G         | A1, G<br>recombinant | Complex              | CRF02_AG              | CRF02_AG  | 02_AG                       | 02_AG  | -                         | -   | -       |
| 114 | CY587                | ON989322                        | A1                    | A1                         | A1                       | A1                                        | A1                 | A1           | A1                   | A1                   | A                     | A         | A1                          | A1     | -                         | -   | -       |
| 115 | CY591                | ON989323                        | A1                    | A1                         | A1                       | A1                                        | A1                 | A1           | A1                   | A1                   | A                     | A         | A1                          | A1     | -                         | -   | -       |
| 116 | CY593                | ON989324                        | B                     | B                          | B                        | B                                         | B                  | B            | B                    | B                    | B                     | B         | B                           | B      | -                         | -   | -       |
| 117 | CY594                | ON989325                        | B                     | B                          | B                        | B                                         | B                  | B            | B                    | B                    | B                     | B         | B                           | B      | -                         | -   | -       |
| 118 | CY599                | ON989326                        | CRF 02_AG             | CRF 02_AG                  | 02_AG                    | 02_AG                                     | G                  | A1 G         | Complex              | Complex              | CRF02_AG              | CRF02_AG  | 02_AG                       | 02_AG  | YES                       | -   | -       |
| 119 | CY601                | ON989327                        | C                     | C                          | C                        | C                                         | C                  | C            | C                    | C                    | C                     | C         | C                           | C      | -                         | -   | -       |
| 120 | CY602                | ON989328                        | CRF 02_AG             | CRF 02_AG                  | 02_AG                    | A1 (check<br>for 02_AG)                   | G                  | A1 G         | Complex              | Complex              | CRF02_AG              | CRF02_AG  | 02_AG                       | 02_AG  | YES                       | -   | -       |
| 121 | CY604                | ON989329                        | F1                    | F1                         | F1                       | F1                                        | F1                 | F1           | F1                   | F1                   | F                     | F         | F1                          | F1     | -                         | -   | -       |
| 122 | CY605                | ON989330                        | A1                    | A1                         | A1                       | A1                                        | A1                 | A1           | A1                   | A1                   | A                     | A         | A1                          | A1     | -                         | -   | -       |
| 123 | CY607                | ON989331                        | B                     | B                          | B                        | B                                         | B                  | B            | B                    | B                    | B                     | B         | B                           | B      | -                         | -   | -       |
| 124 | CY609                | ON989332                        | B                     | B                          | B                        | B                                         | B                  | B            | B                    | B                    | B                     | B         | B                           | B      | -                         | -   | -       |
| 125 | CY611                | ON989333                        | Rec. of<br>18_cpx, G  | CRF 18_cpx                 | F1 (check<br>for 18_cpx) | 18_cpx                                    | B G                | A1 C<br>F1 G | AE, G<br>recombinant | G, K<br>recombinant  | CRF18_cpx             | CRF18_cpx | K                           | 02_AG  | YES                       | YES | YES     |
| 126 | CY612                | ON989334                        | CRF<br>06_CPX         | CRF<br>06_CPX              | 06_cpx                   | 06_cpx                                    | C G                | A1 C<br>G J  | CRF06-like           | Complex              | CRF06_cpx             | CRF06_cpx | 06_CPX                      | 06_CPX | YES                       | YES | YES     |
| 127 | CY614                | OK283059                        | Rec. of G,<br>A1      | Rec. of<br>02_AG, G,<br>A1 | 02_AG                    | Unassigned;<br>02_AG,<br>11_cpx,<br>01_AE | G                  | A1 G         | G                    | Complex              | CRF02_AG              | CRF02_AG  | 02_AG                       | 02_AG  | YES                       | YES | YES     |
| 128 | CY615                | ON989335                        | A1                    | A1                         | A1                       | A1                                        | A1                 | A1           | A1                   | A1                   | A                     | A         | 01_AE                       | 01_AE  | YES                       | YES | YES     |
| 129 | CY616                | ON989336                        | B                     | B                          | B                        | B                                         | B                  | B            | B                    | B                    | B                     | B         | B                           | B      | -                         | -   | -       |
| 130 | CY617                | ON989337                        | F1                    | F1                         | F1                       | F1                                        | F1                 | F1           | F1                   | F1                   | F                     | F         | F1                          | F1     | -                         | -   | -       |
| 131 | CY619                | ON989338                        | G                     | G                          | G                        | G                                         | G                  | G            | G                    | G                    | G                     | G         | G                           | G      | -                         | -   | -       |
| 132 | CY620                | ON989339                        | B                     | Rec. of B,<br>A1           | B                        | Unassigned;<br>B, A1                      | B                  | A1 B         | B, D<br>recombinant  | Complex              | B                     | B         | B                           | B      | YES                       | YES | YES     |

| No. | Samples <sup>1</sup> | GenBank<br>Accession<br>Numbers | REGA 3.0 <sup>4</sup> |                     | COMET 2.3 <sup>5</sup>             |                                                                                                    | jpHMM <sup>6</sup> |           | SCUEAL <sup>7</sup> |            | Stanford <sup>8</sup> |                 | Geno2pheno 3.4 <sup>9</sup> |       | Discrepancy <sup>10</sup> |     |         |
|-----|----------------------|---------------------------------|-----------------------|---------------------|------------------------------------|----------------------------------------------------------------------------------------------------|--------------------|-----------|---------------------|------------|-----------------------|-----------------|-----------------------------|-------|---------------------------|-----|---------|
|     |                      |                                 | PR/RT <sup>2</sup>    | POL <sup>3</sup>    | PR/RT                              | POL                                                                                                | PR/RT              | POL       | PR/RT               | POL        | PR/RT                 | POL             | PR/RT                       | POL   | PR/RT                     | POL | Regions |
| 133 | CY624                | ON989340                        | CRF 02_AG             | CRF 02_AG           | 02_AG                              | 02_AG                                                                                              | C G                | A1 G      | Complex             | CRF02-like | CRF02_AG              | CRF02_AG        | 02_AG                       | 02_AG | YES                       | -   | -       |
| 134 | CY625                | ON989341                        | Rec. of B, G          | Rec. of B,<br>A1, G | Unassigned;<br>02_AG, B,<br>56_cpx | Unassigned;<br>02_AG, B,<br>56_cpx,<br>90_BF1, B,<br>56_cpx, B,<br>51_01B, B,<br>69_01B,<br>90_BF1 | A1 B<br>G          | A1 B<br>G | Complex             | Complex    | B +<br>CRF02_AG       | B +<br>CRF02_AG | 02_AG                       | B     | YES                       | YES | YES     |

The cells highlighted in light-pink color show the discrepant subtyping of 'PR/RT' regions (corresponding to nucleotides 2253 to 3359 on the HXB2 genome), and the cells highlighted in light-gray color show the discrepant subtyping of 'POL' regions (corresponding to nucleotides 2253 to 5250 on HXB2 genome). <sup>1</sup> 'Samples' corresponds to the coded naming of study subject samples that contains five characters; e.g., in CY001, the first two characters, CY, denote Cyprus, the country of origin. The next three characters, 001, denote the study subject's number. <sup>2</sup> 'PR/RT' denotes nucleotide sequences of *protease* and partial *reverse transcriptase* genes (corresponding to nucleotides 2253 to 3359 on the HXB2 genome). <sup>3</sup> 'POL' denotes nucleotide sequences of *protease*, *reverse transcriptase*, *integrase*, and partial *vif* genes (corresponding to nucleotides 2253 to 5250 on the HXB2 genome). <sup>4</sup> REGA HIV-1 subtyping tool version 3.0 identifies the subtypes via using phylogenetic methods; the various recombinations are analyzed with bootscanning methods. It is available at: <http://dbpartners.stanford.edu:8080/RegaSubtyping/stanford-hiv/typingtool/>, accessed on 14 October 2022. <sup>5</sup> COMET 2.3 is the abbreviation for "COntext-based Modeling for Expeditious Typing", while version 2.3 has additional support for HIV-1 nucleotide sequences for CRFs as well as URFs. It is available at: <https://comet.lih.lu/>, accessed on 14 October 2022. <sup>6</sup> jpHMM ('jumping profile hidden Markov model') predicts the genomic recombination of HIV-1 and the accurate breakpoints between the subtypes. It is available online at: <http://jphmm.gobics.de/>, accessed on 14 October 2022. <sup>7</sup> SCUEAL is an algorithm that can subtype only *pol* sequences. It is available at: [http://classic.datamonkey.org/dataupload\\_scueal.php](http://classic.datamonkey.org/dataupload_scueal.php), accessed on 14 October 2022. <sup>8</sup> Stanford University curates the HIV Drug Resistance Database, which provides the public with the HIVdb Program. Its main function is to accept *pol* sequences and, in return, predict the resistance to various drugs, subtyping the sequence in parallel. It is available at: <https://hivdb.stanford.edu/hivdb/by-sequences/>, accessed on 14 October 2022. <sup>9</sup> Geno2pheno (resistance) 3.4 aligns HIV-1 *pol* gene nucleotide sequences to the HXB2 genome in order to predict resistance to ART drugs. It is available at: <https://www.geno2pheno.org/index.php>, accessed on 14 October 2022. <sup>10</sup> 'Discrepancy' denotes the disagreements in subtyping generated by the aforementioned subtyping tools. Discrepancy in the 'PR/RT' region indicates the disagreements in the subtyping of each *PR/RT* nucleotide sequence (corresponding to nucleotides 2253 to 3359 on the HXB2 genome) among different subtyping tools. Discrepancy in the 'POL' region indicates the disagreements in the subtyping of each *pol* nucleotide sequence (corresponding to nucleotides 2253 to 5250 on the HXB2 genome) among different subtyping tools. Discrepancy in 'Regions' denotes the verdict of discrepant result, where the disagreements in both 'PR/RT' and 'POL' regions or 'POL' region only indicate that there are discrepancies among the subtyping tools. Samples identified as discrepant in 'Regions' were selected to proceed with near-full-length HIV-1 genome sequencing.
